# Supplementary material for: <strong>Developmental Changes and Sex Differences in Infants' Neural Sensitivity to Emotional Prosodies in Spoken Words</strong>
Source: Preprints.org preprint supplement (doi:10.20944/preprints202309.2021.v1), 2023-10-03
Supplement: Supplementary file 1 [file supplementary]

**Supplementary Materials**

**Table 2.** *Summary of the linear mixed-effect model using the amplitudes of early MMR as the dependent variable.*

| *Factor* | *Estimate* | *SE* | *df* | | | *t-value* | *p* |
| --- | --- | --- | --- | --- | --- | --- | --- |
| Intercept | 4.41 | 1.64 | 34.99 | | | 2.69 | 0.01 * |
|  |  |  |  | | |  |  |
| *Emotion* |  |  |  | | |  |  |
| Happy | -4.79 | 2.35 | 34 | | | -2.04 | 0.05 * |
| Angry | -5.62 | 1.89 | 34 | | | -2.97 | 0.005 ** |
|  |  |  |  | | |  |  |
| *Region* |  |  |  | | |  |  |
| Frontal | -0.01 | 0.24 | 816 | | | -0.04 | 0.97 |
| Posterior | 0.39 | 0.24 | 816 | | | 1.61 | 0.11 |
|  |  |  |  | | |  |  |
| *Laterality* |  |  |  | | |  |  |
| Left | 0.46 | 0.24 | 816 | | | 1.93 | 0.05 * |
| Right | 0.22 | 0.24 | 816 | | | 0.92 | 0.36 |
| *Participant* |  |  |  | | |  |  |
| Age | -0.41 | 0.19 | 34 | | | -2.11 | 0.04 * |
| Sex | -1.61 | 0.81 | 34 | | | -2 | 0.05 * |
| *Interactions* |  |  |  | | |  |  |
| Happy * Age | 0.37 | 0.28 | 34 | | | 1.34 | 0.19 |
| Angry * Age | 0.53 | 0.22 | 34 | | | 2.35 | 0.02 * |
| Happy * Sex | 1.78 | 1.16 | 34 | | | 1.53 | 0.14 |
| Angry * Sex | 0.71 | 0.94 | 34 | | | 0.76 | 0.45 |
|  |  |  | |  |  |

**Table 3.** *Summary of the linear mixed-effect model using the amplitudes of late MMR as the dependent variable.*

| *Factor* | *Estimate* | *SE* | *df* | | | *t-value* | *p* |
| --- | --- | --- | --- | --- | --- | --- | --- |
| Intercept | 2.67 | 2.06 | 34.88 | | | 1.30 | 0.20 |
|  |  |  |  | | |  |  |
| *Emotion* |  |  |  | | |  |  |
| Happy | -1.87 | 3.01 | 34 | | | -0.62 | 0.54 |
| Angry | -6.16 | 2.41 | 34 | | | -2.55 | 0.02 * |
|  |  |  |  | | |  |  |
| *Region* |  |  |  | | |  |  |
| Frontal | 1.30 | 0.28 | 816 | | | 4.56 | < 0.001 *** |
| Posterior | -1.03 | 0.28 | 816 | | | -3.61 | < 0.001 *** |
|  |  |  |  | | |  |  |
| *Laterality* |  |  |  | | |  |  |
| Left | 0.79 | 0.28 | 816 | | | 2.79 | 0.005 ** |
| Right | 0.34 | 0.28 | 816 | | | 1.20 | 0.23 |
| *Participant* |  |  |  | | |  |  |
| Age | -0.36 | 0.24 | 34 | | | -1.50 | 0.14 |
| Sex | 0.62 | 1.01 | 34 | | | 0.62 | 0.54 |
| *Interactions* |  |  |  | | |  |  |
| Happy * Age | 0.10 | 0.36 | 34 | | | 0.28 | 0.78 |
| Angry * Age | 0.60 | 0.28 | 34 | | | 2.12 | 0.04 * |
| Happy * Sex | 0.85 | 1.49 | 34 | | | 0.57 | 0.57 |
| Angry * Sex | 1.14 | 1.19 | 34 | | | 0.95 | 0.35 |
|  |  |  | |  |  |
